# Supplementary material for: The mediating role of systemic inflammation and moderating role of racialization in disparities in incident dementia
Source: PubMed Central journal article supplement (PMC11246521; doi:10.1038/s43856-024-00569-w), 2024-07-13
Supplement: 43856_2024_569_MOESM2_ESM.pdf [file 43856_2024_569_MOESM2_ESM.pdf]

**Supplemental Table 1:** Distribution of baseline characteristics between included and excluded participants in the United States Retirement Study

| <b>Characteristic</b>                     | <b>Overall</b><br>N = 8,781 <sup>1</sup> | <b>Included</b><br>N = 6,908 <sup>1</sup> | <b>Excluded</b><br>N = 1,873 <sup>1</sup> | <b>p-value<sup>2</sup></b> |
|-------------------------------------------|------------------------------------------|-------------------------------------------|-------------------------------------------|----------------------------|
| <b>Cognitive Status</b>                   |                                          |                                           |                                           |                            |
| Incident dementia                         | 795 (12%)                                | 795 (12%)                                 | 0 (NA%)                                   |                            |
| Cognitively normal or CIND                | 6,113 (88%)                              | 6,113 (88%)                               | 0 (NA%)                                   |                            |
| <b>Baseline CRP (μg/mL)</b>               | 4.55 (8.14)                              | 4.37 (8.00)                               | 5.23 (8.60)                               | <b>&lt;0.001</b>           |
| <b>Age (years)</b>                        | 68.12 (10.38)                            | 67.11 (9.91)                              | 71.84 (11.17)                             | <b>&lt;0.001</b>           |
| <b>Race</b>                               |                                          |                                           |                                           | <b>&lt;0.001</b>           |
| Non-Hispanic Black                        | 1,057 (12%)                              | 813 (12%)                                 | 244 (13%)                                 |                            |
| Hispanic                                  | 794 (9.0%)                               | 633 (9.2%)                                | 161 (8.6%)                                |                            |
| Non-Hispanic Other                        | 189 (2.2%)                               | 0 (0%)                                    | 189 (10%)                                 |                            |
| Non-Hispanic white                        | 6,741 (77%)                              | 5,462 (79%)                               | 1,279 (68%)                               |                            |
| <b>Sex</b>                                |                                          |                                           |                                           | <b>&lt;0.001</b>           |
| Female                                    | 5,290 (60%)                              | 4,234 (61%)                               | 1,056 (56%)                               |                            |
| Male                                      | 3,491 (40%)                              | 2,674 (39%)                               | 817 (44%)                                 |                            |
| <b>Education Category</b>                 |                                          |                                           |                                           | <b>&lt;0.001</b>           |
| > College                                 | 812 (9.2%)                               | 676 (9.8%)                                | 136 (7.3%)                                |                            |
| College/Some                              | 1,575 (18%)                              | 1,297 (19%)                               | 278 (15%)                                 |                            |
| HS or <                                   | 6,394 (73%)                              | 4,935 (71%)                               | 1,459 (78%)                               |                            |
| <b>Alcohol (# drinks/day when drinks)</b> | 0.70 (1.41)                              | 0.71 (1.30)                               | 0.67 (1.77)                               | 0.279                      |
| <b>Smoking</b>                            |                                          |                                           |                                           | <b>&lt;0.001</b>           |
| Current                                   | 1,176 (13%)                              | 851 (12%)                                 | 325 (17%)                                 |                            |
| Former                                    | 3,774 (43%)                              | 2,966 (43%)                               | 808 (43%)                                 |                            |
| Never                                     | 3,831 (44%)                              | 3,091 (45%)                               | 740 (40%)                                 |                            |
| <b>Body Mass Index (kg/m<sup>2</sup>)</b> | 28.33 (5.88)                             | 28.50 (5.79)                              | 27.70 (6.15)                              | <b>&lt;0.001</b>           |
| <b>Chronic Conditions</b>                 | 2.00 (1.42)                              | 1.88 (1.36)                               | 2.44 (1.56)                               | <b>&lt;0.001</b>           |
| <b>Wave</b>                               |                                          |                                           |                                           | <b>&lt;0.001</b>           |
| 2006                                      | 4,178 (48%)                              | 3,485 (50%)                               | 693 (37%)                                 |                            |
| 2008                                      | 4,603 (52%)                              | 3,423 (50%)                               | 1,180 (63%)                               |                            |
| <b>APOE-ε4</b>                            |                                          |                                           |                                           | 0.646                      |
| At least 1                                | 2,373 (27%)                              | 1,859 (27%)                               | 514 (27%)                                 |                            |

| <b>Characteristic</b> | <b>Overall</b><br>N = 8,781 <sup>1</sup> | <b>Included</b><br>N = 6,908 <sup>1</sup> | <b>Excluded</b><br>N = 1,873 <sup>1</sup> | p-value <sup>2</sup> |
|-----------------------|------------------------------------------|-------------------------------------------|-------------------------------------------|----------------------|
| No copy               | 6,408 (73%)                              | 5,049 (73%)                               | 1,359 (73%)                               |                      |

<sup>1</sup>n (%); Mean (SD)

<sup>2</sup>Pearson's Chi-squared test; One-way ANOVA

CRP: C-reactive protein; *APOE-ε4*: apolipoprotein E ε4 allele carrier status.

CIND: cognitive impairment non-dementia

**Supplemental Table 2:** Distribution of baseline sample characteristics by racialized social groups in the Health and Retirement Study, 2006 and 2008

| <b>Characteristic</b>                         | <b>Overall</b><br>N = 6,908 <sup>1</sup> | <b>Non-Hispanic Black</b><br>N = 813 <sup>1</sup> | <b>Hispanic</b><br>N = 633 <sup>1</sup> | <b>Non-Hispanic white</b><br>N = 5,462 <sup>1</sup> | <b>p-value<sup>2</sup></b> |
|-----------------------------------------------|------------------------------------------|---------------------------------------------------|-----------------------------------------|-----------------------------------------------------|----------------------------|
| <b>Cognitive Status</b>                       |                                          |                                                   |                                         |                                                     | <b>&lt;0.001</b>           |
| Incident dementia                             | 795 (12%)                                | 171 (21%)                                         | 103 (16%)                               | 521 (9.5%)                                          |                            |
| Cognitively normal or CIND                    | 6,113 (88%)                              | 642 (79%)                                         | 530 (84%)                               | 4,941 (90%)                                         |                            |
| <b>Baseline CRP (μg/mL)</b>                   | 4.37 (8.00)                              | 6.45 (10.81)                                      | 4.45 (6.70)                             | 4.05 (7.59)                                         | <b>&lt;0.001</b>           |
| <b>CRP Category</b>                           |                                          |                                                   |                                         |                                                     | <b>&lt;0.001</b>           |
| <25 <sup>th</sup>                             | 1,727 (25%)                              | 147 (18%)                                         | 122 (19%)                               | 1,458 (27%)                                         |                            |
| ≥25 <sup>th</sup> & <50 <sup>th</sup>         | 1,713 (25%)                              | 143 (18%)                                         | 161 (25%)                               | 1,409 (26%)                                         |                            |
| ≥50 <sup>th</sup> & <75 <sup>th</sup>         | 1,720 (25%)                              | 200 (25%)                                         | 182 (29%)                               | 1,338 (24%)                                         |                            |
| ≥75 <sup>th</sup>                             | 1,748 (25%)                              | 323 (40%)                                         | 168 (27%)                               | 1,257 (23%)                                         |                            |
| <b>Age (years)</b>                            | 67.11 (9.91)                             | 65.89 (9.40)                                      | 64.00 (9.89)                            | 67.65 (9.91)                                        | <b>&lt;0.001</b>           |
| <b>Sex</b>                                    |                                          |                                                   |                                         |                                                     | <b>&lt;0.001</b>           |
| Female                                        | 4,234 (61%)                              | 553 (68%)                                         | 403 (64%)                               | 3,278 (60%)                                         |                            |
| Male                                          | 2,674 (39%)                              | 260 (32%)                                         | 230 (36%)                               | 2,184 (40%)                                         |                            |
| <b>Educational Category</b>                   |                                          |                                                   |                                         |                                                     | <b>&lt;0.001</b>           |
| > College                                     | 676 (9.8%)                               | 42 (5.2%)                                         | 13 (2.1%)                               | 621 (11%)                                           |                            |
| College/Some                                  | 1,297 (19%)                              | 107 (13%)                                         | 53 (8.4%)                               | 1,137 (21%)                                         |                            |
| HS or <                                       | 4,935 (71%)                              | 664 (82%)                                         | 567 (90%)                               | 3,704 (68%)                                         |                            |
| <b>Alcohol Use (# drinks/day when drinks)</b> | 0.71 (1.30)                              | 0.49 (1.22)                                       | 0.57 (1.31)                             | 0.75 (1.30)                                         | <b>&lt;0.001</b>           |
| <b>Smoking</b>                                |                                          |                                                   |                                         |                                                     | <b>&lt;0.001</b>           |
| Current                                       | 851 (12%)                                | 140 (17%)                                         | 83 (13%)                                | 628 (11%)                                           |                            |
| Former                                        | 2,966 (43%)                              | 328 (40%)                                         | 241 (38%)                               | 2,397 (44%)                                         |                            |
| Never                                         | 3,091 (45%)                              | 345 (42%)                                         | 309 (49%)                               | 2,437 (45%)                                         |                            |
| <b>Body Mass Index (kg/m<sup>2</sup>)</b>     | 28.50 (5.79)                             | 30.51 (6.72)                                      | 29.44 (5.42)                            | 28.10 (5.60)                                        | <b>&lt;0.001</b>           |
| <b>Chronic Conditions</b>                     | 1.88 (1.36)                              | 2.15 (1.43)                                       | 1.72 (1.38)                             | 1.85 (1.34)                                         | <b>&lt;0.001</b>           |
| <b>APOE-ε4</b>                                |                                          |                                                   |                                         |                                                     | <b>&lt;0.001</b>           |
| At least 1 copy                               | 1,859 (27%)                              | 290 (36%)                                         | 137 (22%)                               | 1,432 (26%)                                         |                            |
| No copy                                       | 5,049 (73%)                              | 523 (64%)                                         | 496 (78%)                               | 4,030 (74%)                                         |                            |
| <b>Time</b>                                   |                                          |                                                   |                                         |                                                     | <b>&lt;0.001</b>           |

| Characteristic | Overall<br>N = 6,908 <sup>1</sup> | Non-Hispanic<br>Black<br>N = 813 <sup>1</sup> | Hispanic<br>N = 633 <sup>1</sup> | Non-Hispanic<br>white<br>N = 5,462 <sup>1</sup> | p-value <sup>2</sup> |
|----------------|-----------------------------------|-----------------------------------------------|----------------------------------|-------------------------------------------------|----------------------|
| 2              | 302 (4.4%)                        | 80 (9.8%)                                     | 39 (6.2%)                        | 183 (3.4%)                                      |                      |
| 4              | 269 (3.9%)                        | 52 (6.4%)                                     | 37 (5.8%)                        | 180 (3.3%)                                      |                      |
| 6              | 6,337 (92%)                       | 681 (84%)                                     | 557 (88%)                        | 5,099 (93%)                                     |                      |
| <b>Wave</b>    |                                   |                                               |                                  |                                                 | <b>0.004</b>         |
| 2006           | 3,485 (50%)                       | 377 (46%)                                     | 297 (47%)                        | 2,811 (51%)                                     |                      |
| 2008           | 3,423 (50%)                       | 436 (54%)                                     | 336 (53%)                        | 2,651 (49%)                                     |                      |

<sup>1</sup>n (%); Mean (SD)

<sup>2</sup>Pearson's Chi-squared test; One-way ANOVA

CRP: C-reactive protein; *APOE-ε4*: apolipoprotein E ε4 allele carrier status.

CIND: cognitive impairment non-dementia

**Supplemental Table 3:** Baseline levels of C-reactive protein (CRP) by racialized social groups and sex in the United States Health and Retirement Study, waves 2006 & 2008

| Race/ethnicity     | Sex    | Observations | C-reactive protein ( $\mu\text{g/mL}$ ) percentiles |       |      |        |                  |                  |                  |      |
|--------------------|--------|--------------|-----------------------------------------------------|-------|------|--------|------------------|------------------|------------------|------|
|                    |        |              | Mean                                                | SD    | Min  | Max    | 25 <sup>th</sup> | 50 <sup>th</sup> | 75 <sup>th</sup> | IQR  |
| Non-Hispanic Black | Female | 553          | 6.83                                                | 9.99  | 0.04 | 85.75  | 1.41             | 3.93             | 8.29             | 6.88 |
| Non-Hispanic Black | Male   | 260          | 5.63                                                | 12.36 | 0.03 | 125.05 | 1.12             | 2.49             | 5.84             | 4.72 |
| Hispanic           | Female | 403          | 4.76                                                | 6.48  | 0.08 | 78.11  | 1.47             | 2.67             | 5.69             | 4.22 |
| Hispanic           | Male   | 230          | 3.91                                                | 7.10  | 0.04 | 66.70  | 0.93             | 1.88             | 3.89             | 2.96 |
| Non-Hispanic white | Female | 3278         | 4.46                                                | 8.10  | 0.04 | 172.78 | 1.02             | 2.22             | 5.06             | 4.04 |
| Non-Hispanic white | Male   | 2184         | 3.43                                                | 6.69  | 0.02 | 121.10 | 0.80             | 1.56             | 3.44             | 2.64 |

**Supplemental Table 4:** Distribution of baseline sample characteristics by percentiles of C-reactive protein, United States Health and Retirement Study, 2006 and 2008

| Characteristic                                      | C-reactive protein ( $\mu\text{g/mL}$ ) percentiles |                                 |                                                                     |                                                                     |                                     | p-value <sup>2</sup> |
|-----------------------------------------------------|-----------------------------------------------------|---------------------------------|---------------------------------------------------------------------|---------------------------------------------------------------------|-------------------------------------|----------------------|
|                                                     | Overall                                             | 25 <sup>th</sup><br>( $<0.98$ ) | 25 <sup>th</sup> - 50 <sup>th</sup><br>( $\geq 0.98$ &<br>$<2.06$ ) | 50 <sup>th</sup> - 75 <sup>th</sup><br>( $\geq 2.06$ &<br>$<4.73$ ) | 75 <sup>th</sup><br>( $\geq 4.73$ ) |                      |
|                                                     | N = 6,908 <sup>1</sup>                              | N = 1,727 <sup>1</sup>          | N = 1,713 <sup>1</sup>                                              | N = 1,720 <sup>1</sup>                                              | N = 1,748 <sup>1</sup>              |                      |
| <b>Cognitive Status</b>                             |                                                     |                                 |                                                                     |                                                                     |                                     | 0.418                |
| Incident dementia                                   | 795 (12%)                                           | 199 (12%)                       | 185 (11%)                                                           | 192 (11%)                                                           | 219 (13%)                           |                      |
| Cognitively normal or CIND                          | 6,113 (88%)                                         | 1,528 (88%)                     | 1,528 (89%)                                                         | 1,528 (89%)                                                         | 1,529 (87%)                         |                      |
| <b>Baseline CRP (<math>\mu\text{g/mL}</math>)</b>   | 4.37 (8.00)                                         | 0.54 (0.25)                     | 1.46 (0.29)                                                         | 3.15 (0.76)                                                         | 12.21 (12.90)                       | <b>&lt;0.001</b>     |
| <b>Age (years)</b>                                  | 67.11 (9.91)                                        | 67.52 (10.29)                   | 67.61 (9.72)                                                        | 67.32 (9.86)                                                        | 66.00 (9.70)                        | <b>&lt;0.001</b>     |
| <b>Race</b>                                         |                                                     |                                 |                                                                     |                                                                     |                                     | <b>&lt;0.001</b>     |
| Non-Hispanic Black                                  | 813 (12%)                                           | 147 (8.5%)                      | 143 (8.3%)                                                          | 200 (12%)                                                           | 323 (18%)                           |                      |
| Hispanic                                            | 633 (9.2%)                                          | 122 (7.1%)                      | 161 (9.4%)                                                          | 182 (11%)                                                           | 168 (9.6%)                          |                      |
| Non-Hispanic white                                  | 5,462 (79%)                                         | 1,458 (84%)                     | 1,409 (82%)                                                         | 1,338 (78%)                                                         | 1,257 (72%)                         |                      |
| <b>Sex</b>                                          |                                                     |                                 |                                                                     |                                                                     |                                     | <b>&lt;0.001</b>     |
| Female                                              | 4,234 (61%)                                         | 939 (54%)                       | 968 (57%)                                                           | 1,080 (63%)                                                         | 1,247 (71%)                         |                      |
| Male                                                | 2,674 (39%)                                         | 788 (46%)                       | 745 (43%)                                                           | 640 (37%)                                                           | 501 (29%)                           |                      |
| <b>Educational Category</b>                         |                                                     |                                 |                                                                     |                                                                     |                                     | <b>&lt;0.001</b>     |
| > College                                           | 676 (9.8%)                                          | 258 (15%)                       | 167 (9.7%)                                                          | 133 (7.7%)                                                          | 118 (6.8%)                          |                      |
| College/Some                                        | 1,297 (19%)                                         | 347 (20%)                       | 363 (21%)                                                           | 309 (18%)                                                           | 278 (16%)                           |                      |
| HS or <                                             | 4,935 (71%)                                         | 1,122 (65%)                     | 1,183 (69%)                                                         | 1,278 (74%)                                                         | 1,352 (77%)                         |                      |
| <b>Alcohol Use (# drinks/day when drinks)</b>       | 0.71 (1.30)                                         | 0.79 (1.33)                     | 0.77 (1.34)                                                         | 0.68 (1.26)                                                         | 0.59 (1.25)                         | <b>&lt;0.001</b>     |
| <b>Smoking</b>                                      |                                                     |                                 |                                                                     |                                                                     |                                     | <b>&lt;0.001</b>     |
| Current                                             | 851 (12%)                                           | 151 (8.7%)                      | 183 (11%)                                                           | 241 (14%)                                                           | 276 (16%)                           |                      |
| Former                                              | 2,966 (43%)                                         | 712 (41%)                       | 779 (45%)                                                           | 728 (42%)                                                           | 747 (43%)                           |                      |
| Never                                               | 3,091 (45%)                                         | 864 (50%)                       | 751 (44%)                                                           | 751 (44%)                                                           | 725 (41%)                           |                      |
| <b>Body Mass Index (<math>\text{kg/m}^2</math>)</b> | 28.50 (5.79)                                        | 26.01 (4.44)                    | 27.55 (4.69)                                                        | 28.98 (5.31)                                                        | 31.43 (6.92)                        | <b>&lt;0.001</b>     |
| <b>Chronic Conditions</b>                           | 1.88 (1.36)                                         | 1.67 (1.35)                     | 1.75 (1.31)                                                         | 1.91 (1.32)                                                         | 2.17 (1.41)                         | <b>&lt;0.001</b>     |
| <b>APOE-<math>\epsilon 4</math></b>                 |                                                     |                                 |                                                                     |                                                                     |                                     | <b>&lt;0.001</b>     |
| At least 1 copy                                     | 1,859 (27%)                                         | 601 (35%)                       | 483 (28%)                                                           | 415 (24%)                                                           | 360 (21%)                           |                      |
| No copy                                             | 5,049 (73%)                                         | 1,126 (65%)                     | 1,230 (72%)                                                         | 1,305 (76%)                                                         | 1,388 (79%)                         |                      |

| Characteristic | C-reactive protein ( $\mu\text{g/mL}$ ) percentiles |                                 |                                                                     |                                                                     |                                     | p-value <sup>2</sup> |
|----------------|-----------------------------------------------------|---------------------------------|---------------------------------------------------------------------|---------------------------------------------------------------------|-------------------------------------|----------------------|
|                | Overall                                             | 25 <sup>th</sup><br>( $<0.98$ ) | 25 <sup>th</sup> - 50 <sup>th</sup><br>( $\geq 0.98$ &<br>$<2.06$ ) | 50 <sup>th</sup> - 75 <sup>th</sup><br>( $\geq 2.06$ &<br>$<4.73$ ) | 75 <sup>th</sup><br>( $\geq 4.73$ ) |                      |
|                | N = 6,908 <sup>1</sup>                              | N = 1,727 <sup>1</sup>          | N = 1,713 <sup>1</sup>                                              | N = 1,720 <sup>1</sup>                                              | N = 1,748 <sup>1</sup>              |                      |
| <b>Time</b>    |                                                     |                                 |                                                                     |                                                                     |                                     | <b>0.007</b>         |
| 2              | 302 (4.4%)                                          | 59 (3.4%)                       | 84 (4.9%)                                                           | 64 (3.7%)                                                           | 95 (5.4%)                           |                      |
| 4              | 269 (3.9%)                                          | 72 (4.2%)                       | 53 (3.1%)                                                           | 81 (4.7%)                                                           | 63 (3.6%)                           |                      |
| 6              | 6,337 (92%)                                         | 1,596 (92%)                     | 1,576 (92%)                                                         | 1,575 (92%)                                                         | 1,590 (91%)                         |                      |
| <b>Wave</b>    |                                                     |                                 |                                                                     |                                                                     |                                     | <b>0.035</b>         |
| 2006           | 3,485 (50%)                                         | 899 (52%)                       | 832 (49%)                                                           | 839 (49%)                                                           | 915 (52%)                           |                      |
| 2008           | 3,423 (50%)                                         | 828 (48%)                       | 881 (51%)                                                           | 881 (51%)                                                           | 833 (48%)                           |                      |

<sup>1</sup>n (%); Mean (SD)

<sup>2</sup>Pearson's Chi-squared test; One-way ANOVA

CRP: C-reactive protein; *APOE-ε4*: apolipoprotein E  $\epsilon 4$  allele carrier status.

CIND: cognitive impairment non-dementia

**Supplemental Table 5:** Odds ratio of elevated levels of C-reactive protein ( $\geq 4.73\mu\text{g/mL}$  or  $\geq 75^{\text{th}}$  percentile) stratified by minoritized status and racialized social groups in the US Health and Retirement Study, waves 2006 & 2008.

|                                       | <b>Non-Hispanic Black vs non-Hispanic white<sup>1</sup></b><br>N = 6,275 |             | <b>Hispanic vs non-Hispanic white<sup>1</sup></b><br>N = 6,095 |             | <b>Minoritized Racial Group vs non-Hispanic white<sup>2</sup></b><br>N = 6,908 |             |
|---------------------------------------|--------------------------------------------------------------------------|-------------|----------------------------------------------------------------|-------------|--------------------------------------------------------------------------------|-------------|
| <b>Models</b>                         |                                                                          |             |                                                                |             |                                                                                |             |
| <b>Unadjusted</b>                     | 2.21 <sup>***</sup>                                                      | [1.89,2.57] | 1.21 <sup>*</sup>                                              | [1.00,1.46] | 1.72 <sup>***</sup>                                                            | [1.52,1.95] |
| <b>Demographic<sup>+</sup></b>        | 2.12 <sup>***</sup>                                                      | [1.81,2.48] | 1.02                                                           | [0.84,1.24] | 1.58 <sup>***</sup>                                                            | [1.38,1.80] |
| <b>Risk Factors<sup>§</sup></b>       | 1.72 <sup>***</sup>                                                      | [1.44,2.04] | 0.99                                                           | [0.80,1.21] | 1.37 <sup>***</sup>                                                            | [1.19,1.58] |
| <b>Chronic Conditions<sup>§</sup></b> | 1.70 <sup>***</sup>                                                      | [1.43,2.02] | 1.00                                                           | [0.81,1.23] | 1.37 <sup>***</sup>                                                            | [1.19,1.58] |

Demographic model: adjusted for age, sex, education categories, *APOE-ε4* allele status, and wave.

<sup>§</sup> Risk factors model: adjusted for age, sex, education categories, *APOE-ε4* allele status, wave, smoking status, alcohol consumption, body mass index.

<sup>§</sup> Chronic conditions model: adjusted for age, sex, education categories, *APOE-ε4* allele status, wave, smoking status, alcohol consumption, body mass index, and chronic conditions

<sup>1</sup> Odds ratios, CI: confidence interval in brackets

<sup>2</sup> Odds ratios, CI: confidence intervals in brackets. Minoritized racial group: (non-Hispanic Black and Hispanic participants)

\*  $p < 0.05$ , \*\*  $p < 0.01$ , \*\*\*  $p < 0.001$



**Supplemental Table 6:** Randomized analogue mediation models for racial disparities in incident dementia using elevated levels of C-reactive protein (CRP  $\geq 4.73\mu\text{g/mL}$ ) as mediator. Models are stratified by minoritized status and racialized social groups in a sample of United States adults in the Health and Retirement Study

| Mediator (CRP)                | Minoritized Racial Group<br>vs non-Hispanic white<br>N = 6,908 |         |         |         | Randomized Analogue Model*<br>(Outcome: Incident Dementia)<br>non-Hispanic Black<br>vs non-Hispanic white<br>N = 6,275 |         |         |         | Hispanic<br>vs non-Hispanic white<br>N = 6,095 |         |         |         |
|-------------------------------|----------------------------------------------------------------|---------|---------|---------|------------------------------------------------------------------------------------------------------------------------|---------|---------|---------|------------------------------------------------|---------|---------|---------|
|                               | Estimate                                                       | [95%CI] | [95%CI] | p-value | Estimate                                                                                                               | [95%CI] | [95%CI] | p-value | Estimate                                       | [95%CI] | [95%CI] | p-value |
| <b>Excess Risk</b>            |                                                                |         |         |         |                                                                                                                        |         |         |         |                                                |         |         |         |
| RERI Controlled Direct Effect | 1.29                                                           | 0.94    | 1.70    | <0.00   | 1.67                                                                                                                   | 1.23    | 2.33    | <0.00   | 0.90                                           | 0.45    | 1.47    | <0.00   |
| RERI Interaction Reference    | 0.17                                                           | 0.02    | 0.38    | 0.04    | 0.06                                                                                                                   | -0.16   | 0.32    | 0.66    | 0.38                                           | 0.11    | 0.82    | 0.01    |
| RERI Interaction Mediation    | 0.06                                                           | 0.00    | 0.09    | 0.04    | 0.03                                                                                                                   | -0.06   | 0.12    | 0.65    | 0.01                                           | -0.09   | 0.07    | 0.94    |
| RERI Pure Indirect Effect     | 0.01                                                           | 0.00    | 0.02    | 0.23    | 0.01                                                                                                                   | 0.00    | 0.03    | 0.14    | 0.00                                           | -0.01   | 0.01    | 0.99    |
| <b>% Attributable</b>         |                                                                |         |         |         |                                                                                                                        |         |         |         |                                                |         |         |         |
| % Controlled Direct Effect    | 0.84                                                           | 0.70    | 0.98    | <0.00   | 0.94                                                                                                                   | 0.76    | 1.12    | <0.00   | 0.70                                           | 0.43    | 0.91    | <0.00   |
| % Interaction Reference       | 0.11                                                           | 0.01    | 0.25    | 0.04    | 0.03                                                                                                                   | -0.09   | 0.17    | 0.66    | 0.30                                           | 0.09    | 0.58    | 0.01    |
| % Interaction Mediation       | 0.04                                                           | 0.00    | 0.06    | 0.04    | 0.02                                                                                                                   | -0.03   | 0.06    | 0.65    | 0.01                                           | -0.07   | 0.06    | 0.94    |
| % Pure Indirect Effect        | 0.01                                                           | 0.00    | 0.01    | 0.23    | 0.01                                                                                                                   | 0.00    | 0.02    | 0.14    | 0.00                                           | -0.01   | 0.01    | 0.99    |
| Percent Mediated              | 0.04                                                           | 0.00    | 0.06    | 0.01    | 0.02                                                                                                                   | -0.03   | 0.07    | 0.42    | 0.01                                           | -0.08   | 0.06    | 0.94    |
| Percent due to Interaction    | 0.15                                                           | 0.01    | 0.29    | 0.04    | 0.05                                                                                                                   | -0.12   | 0.23    | 0.66    | 0.30                                           | 0.09    | 0.57    | 0.01    |
| Percent Eliminated            | 0.16                                                           | 0.02    | 0.30    | 0.03    | 0.06                                                                                                                   | -0.12   | 0.24    | 0.56    | 0.30                                           | 0.09    | 0.57    | 0.01    |

\*Model: outcome 6-year incident dementia, model adjusting for age, sex, education categories, wave, smoking status, alcohol consumption, body mass index, alcohol consumption, and chronic conditions, using *APOE-ε4* as variable affected by the racialized social group through ancestry. Minoritized racial group: (non-Hispanic Black and Hispanic participants)

**Supplemental Table 7A:** Meditational E-values for regression-based models; estimates are presented in the rate ratio scale. Models are stratified by racialized social groups in a sample of the United States adults in the Health and Retirement Study.

| Rate Ratio Scale                      | Minoritized vs non-Hispanic white*        |          |          |         |            |            |
|---------------------------------------|-------------------------------------------|----------|----------|---------|------------|------------|
|                                       | Estimate                                  | LB 95%CI | UB 95%CI | E-value | E-value LB | E-value UB |
| Controlled direct effect (Rcde)       | 2.30                                      | 1.94     | 2.74     | 4.03    | 3.28       | NA         |
| Pure natural direct effect (Rpnde)    | 2.43                                      | 2.11     | 2.81     | 4.29    | 3.64       | NA         |
| Total natural direct effect (Rtnde)   | 2.46                                      | 2.13     | 2.83     | 4.35    | 3.69       | NA         |
| Pure natural indirect effect (Rpnie)  | 1.01                                      | 1.00     | 1.02     | 1.09    | 1.00       | NA         |
| Total natural indirect effect (Rtnie) | 1.02                                      | 1.00     | 1.04     | 1.16    | 1.06       | NA         |
| Total effect (Rte)                    | 2.47                                      | 2.15     | 2.85     | 4.38    | 3.72       | NA         |
|                                       | non-Hispanic Black vs non-Hispanic white* |          |          |         |            |            |
|                                       | Estimate                                  | LB 95%CI | UB 95%CI | E-value | E-value LB | E-value UB |
| Controlled direct effect (Rcde)       | 2.65                                      | 2.18     | 3.30     | 4.75    | 3.79       | NA         |
| Pure natural direct effect (Rpnde)    | 2.65                                      | 2.25     | 3.20     | 4.75    | 3.92       | NA         |
| Total natural direct effect (Rtnde)   | 2.65                                      | 2.26     | 3.20     | 4.75    | 3.95       | NA         |
| Pure natural indirect effect (Rpnie)  | 1.01                                      | 1.00     | 1.04     | 1.11    | 1.00       | NA         |
| Total natural indirect effect (Rtnie) | 1.01                                      | 0.98     | 1.05     | 1.11    | 1.00       | NA         |
| Total effect (Rte)                    | 2.68                                      | 2.29     | 3.22     | 4.80    | 4.00       | NA         |
|                                       | Hispanic vs non-Hispanic white*           |          |          |         |            |            |
|                                       | Estimate                                  | LB 95%CI | UB 95%CI | E-value | E-value LB | E-value UB |
| Controlled direct effect (Rcde)       | 1.98                                      | 1.49     | 2.58     | 3.36    | 2.34       | NA         |
| Pure natural direct effect (Rpnde)    | 2.33                                      | 1.86     | 2.86     | 4.09    | 3.13       | NA         |
| Total natural direct effect (Rtnde)   | 2.31                                      | 1.85     | 2.85     | 4.05    | 3.11       | NA         |
| Pure natural indirect effect (Rpnie)  | 1.00                                      | 0.99     | 1.01     | 1.05    | NA         | 1.00       |
| Total natural indirect effect (Rtnie) | 0.99                                      | 0.96     | 1.03     | 1.11    | NA         | 1.00       |
| Total effect (Rte)                    | 2.31                                      | 1.85     | 2.84     | 4.04    | 3.10       | NA         |

\* These E-values are on the rate ratio scale and correspond to the decomposition presented on Table 3

LB: Lower bound; UB: Upper bound

95%CI: 95% Confidence interval

NA: not applicable

**Supplemental Table 7B:** Mediational E-values for randomized analogue models; estimates are presented in the rate ratio scale. Models are stratified by racialized social groups in a sample of the United States adults in the Health and Retirement Study.

| Rate Ratio Scale                                    | Minoritized vs non-Hispanic white*        |          |          |         |            |            |
|-----------------------------------------------------|-------------------------------------------|----------|----------|---------|------------|------------|
|                                                     | Estimate                                  | LB 95%CI | UB 95%CI | E-value | E-value LB | E-value UB |
| Controlled direct effect (Rcde)                     | 2.33                                      | 1.97     | 2.78     | 4.08    | 3.35       | NA         |
| Pure natural direct effect (rRpnde) <sup>+</sup>    | 2.46                                      | 2.15     | 2.88     | 4.36    | 3.73       | NA         |
| Total natural direct effect (rRtnde) <sup>+</sup>   | 2.50                                      | 2.17     | 2.92     | 4.45    | 3.77       | NA         |
| Pure natural indirect effect (rRpnie) <sup>+</sup>  | 1.01                                      | 1.00     | 1.02     | 1.11    | 1.00       | NA         |
| Total natural indirect effect (rRtnie) <sup>+</sup> | 1.03                                      | 1.00     | 1.04     | 1.19    | 1.04       | NA         |
| Total effect (Rte)                                  | 2.53                                      | 2.19     | 2.93     | 4.49    | 3.80       | NA         |
|                                                     | non-Hispanic Black vs non-Hispanic white* |          |          |         |            |            |
|                                                     | Estimate                                  | LB 95%CI | UB 95%CI | E-value | E-value LB | E-value UB |
| Controlled direct effect (Rcde)                     | 2.73                                      | 2.29     | 3.43     | 4.91    | 4.00       | NA         |
| Pure natural direct effect (rRpnde) <sup>+</sup>    | 2.73                                      | 2.35     | 3.34     | 4.91    | 4.13       | NA         |
| Total natural direct effect (rRtnde) <sup>+</sup>   | 2.74                                      | 2.35     | 3.29     | 4.91    | 4.14       | NA         |
| Pure natural indirect effect (rRpnie) <sup>+</sup>  | 1.01                                      | 1.00     | 1.03     | 1.13    | 1.00       | NA         |
| Total natural indirect effect (rRtnie) <sup>+</sup> | 1.02                                      | 0.98     | 1.05     | 1.14    | 1.00       | NA         |
| Total effect (Rte)                                  | 2.77                                      | 2.38     | 3.35     | 4.99    | 4.19       | NA         |
|                                                     | Hispanic vs non-Hispanic white*           |          |          |         |            |            |
|                                                     | Estimate                                  | LB 95%CI | UB 95%CI | E-value | E-value LB | E-value UB |
| Controlled direct effect (Rcde)                     | 1.93                                      | 1.46     | 2.53     | 3.27    | 2.28       | NA         |
| Pure natural direct effect (rRpnde) <sup>+</sup>    | 2.28                                      | 1.87     | 2.85     | 3.99    | 3.15       | NA         |
| Total natural direct effect (rRtnde) <sup>+</sup>   | 2.29                                      | 1.87     | 2.83     | 4.01    | 3.15       | NA         |
| Pure natural indirect effect (rRpnie) <sup>+</sup>  | 1.00                                      | 0.99     | 1.01     | 1.02    | 1.00       | NA         |
| Total natural indirect effect (rRtnie) <sup>+</sup> | 1.00                                      | 0.96     | 1.04     | 1.07    | 1.00       | NA         |
| Total effect (Rte)                                  | 2.29                                      | 1.87     | 2.84     | 4.01    | 3.15       | NA         |

\* These E-values are on the rate ratio scale and correspond to the decomposition presented on Supplemental Table 6

+ Randomized analogue estimate

LB: Lower bound; UB: Upper bound

95%CI: 95% Confidence interval

NA: not applicable

**Supplemental Table 8:** Randomized analogue mediation models for racial disparities in incident dementia using elevated levels of C-reactive protein (CRP  $\geq 4.73\mu\text{g/mL}$ ) as mediator. Models are stratified by minoritized status and racialized social groups in a sample of United States adults in the Health and Retirement Study

| Mediator (CRP)                | Minoritized Racial Group<br>vs non-Hispanic white<br>N = 6,908 |         |         |         | Randomized Analogue Model <sup>+</sup><br>(Outcome: Incident Dementia)<br>non-Hispanic Black<br>vs non-Hispanic white<br>N = 6,275 |         |         |         | Hispanic<br>vs non-Hispanic white<br>N = 6,095 |         |         |         |
|-------------------------------|----------------------------------------------------------------|---------|---------|---------|------------------------------------------------------------------------------------------------------------------------------------|---------|---------|---------|------------------------------------------------|---------|---------|---------|
|                               | Estimate                                                       | [95%CI] | [95%CI] | p-value | Estimate                                                                                                                           | [95%CI] | [95%CI] | p-value | Estimate                                       | [95%CI] | [95%CI] | p-value |
| <b>Excess Risk</b>            |                                                                |         |         |         |                                                                                                                                    |         |         |         |                                                |         |         |         |
| RERI Controlled Direct Effect | 1.29                                                           | 0.91    | 1.70    | <0.00   | 1.69                                                                                                                               | 1.20    | 2.27    | <0.00   | 0.90                                           | 0.43    | 1.46    | 0.00    |
| RERI Interaction Reference    | 0.19                                                           | 0.02    | 0.39    | 0.03    | 0.07                                                                                                                               | -0.15   | 0.35    | 0.55    | 0.41                                           | 0.11    | 0.82    | 0.00    |
| RERI Interaction Mediation    | 0.05                                                           | 0.00    | 0.09    | 0.03    | 0.02                                                                                                                               | -0.05   | 0.11    | 0.55    | -0.02                                          | -0.10   | 0.07    | 0.94    |
| RERI Pure Indirect Effect     | 0.01                                                           | 0.00    | 0.02    | 0.23    | 0.01                                                                                                                               | 0.00    | 0.03    | 0.15    | 0.00                                           | -0.01   | 0.01    | 0.96    |
| <b>% Attributable</b>         |                                                                |         |         |         |                                                                                                                                    |         |         |         |                                                |         |         |         |
| % Controlled Direct Effect    | 0.84                                                           | 0.71    | 0.98    | <0.00   | 0.95                                                                                                                               | 0.75    | 1.11    | 0.00    | 0.70                                           | 0.44    | 0.91    | 0.00    |
| % Interaction Reference       | 0.12                                                           | 0.01    | 0.25    | 0.03    | 0.04                                                                                                                               | -0.09   | 0.18    | 0.55    | 0.32                                           | 0.09    | 0.57    | 0.00    |
| % Interaction Mediation       | 0.03                                                           | 0.00    | 0.06    | 0.03    | 0.01                                                                                                                               | -0.03   | 0.06    | 0.55    | -0.02                                          | -0.07   | 0.05    | 0.94    |
| % Pure Indirect Effect        | 0.00                                                           | 0.00    | 0.01    | 0.23    | 0.00                                                                                                                               | 0.00    | 0.02    | 0.15    | 0.00                                           | -0.01   | 0.01    | 0.96    |
| Percent Mediated              | 0.03                                                           | 0.00    | 0.06    | 0.01    | 0.01                                                                                                                               | -0.02   | 0.07    | 0.35    | -0.02                                          | -0.08   | 0.06    | 0.94    |
| Percent due to Interaction    | 0.15                                                           | 0.02    | 0.28    | 0.03    | 0.05                                                                                                                               | -0.12   | 0.25    | 0.55    | 0.30                                           | 0.09    | 0.56    | 0.00    |
| Percent Eliminated            | 0.16                                                           | 0.02    | 0.29    | 0.02    | 0.05                                                                                                                               | -0.11   | 0.25    | 0.47    | 0.30                                           | 0.09    | 0.56    | 0.00    |

<sup>+</sup>Model: outcome 6-year incident cognitive impairment, model adjusting for age, sex, wave, smoking status, alcohol consumption, body mass index, alcohol consumption, and chronic conditions, using *APOE-ε4* and educational attainment as variables affected by racialized social group. Minoritized racial group: (non-Hispanic Black and Hispanic participants)

**Supplemental Table 9:** Incidence rate ratios from Poisson regression analysis, estimates represent the association between elevated levels of C-reactive protein (CRP) ( $\geq 4.73\mu\text{g/mL}$ ) and 6-year cognitive impairment (dementia or cognitive impairment non-dementia) in the United States Health and Retirement Study. Models are stratified by racialized social groups and minoritized status.

| Incident Cognitive Impairment (dementia or cognitive impairment non-dementia) |                  |                     |                                                   |                     |                       |                     |                  |                     |                       |                     |
|-------------------------------------------------------------------------------|------------------|---------------------|---------------------------------------------------|---------------------|-----------------------|---------------------|------------------|---------------------|-----------------------|---------------------|
|                                                                               | Overall          |                     | Minoritized<br>(non-Hispanic<br>Black & Hispanic) |                     | Non-Hispanic<br>Black |                     | Hispanic         |                     | Non-Hispanic<br>white |                     |
|                                                                               | N = 6,151        |                     | N = 1,065                                         |                     | N = 580               |                     | N = 485          |                     | N = 5,086             |                     |
| <b>Models</b>                                                                 | IRR <sup>1</sup> | 95% CI <sup>1</sup> | IRR <sup>1</sup>                                  | 95% CI <sup>1</sup> | IRR <sup>1</sup>      | 95% CI <sup>1</sup> | IRR <sup>1</sup> | 95% CI <sup>1</sup> | IRR <sup>1</sup>      | 95% CI <sup>1</sup> |
| <b>Unadjusted</b>                                                             |                  |                     |                                                   |                     |                       |                     |                  |                     |                       |                     |
| < 75 <sup>th</sup>                                                            | 1                | -                   | 1                                                 | -                   | 1                     | -                   | 1                | -                   | 1                     | -                   |
| $\geq 75^{\text{th}}$ ( $\geq 4.73\mu\text{g/mL}$ )                           | 1.06             | [0.96,1.18]         | 1.02                                              | [0.86,1.22]         | 0.97                  | [0.77,1.21]         | 1.10             | [0.82,1.46]         | 1.00                  | [0.88,1.13]         |
| <b>Demographic<sup>+</sup></b>                                                |                  |                     |                                                   |                     |                       |                     |                  |                     |                       |                     |
| < 75 <sup>th</sup>                                                            | 1                | -                   | 1                                                 | -                   | 1                     | -                   | 1                | -                   | 1                     | -                   |
| $\geq 75^{\text{th}}$ ( $\geq 4.73\mu\text{g/mL}$ )                           | 1.08             | [0.97,1.19]         | 1.04                                              | [0.87,1.24]         | 1.00                  | [0.80,1.26]         | 1.08             | [0.81,1.43]         | 1.08                  | [0.96,1.22]         |
| <b>Risk Factors<sup>§</sup></b>                                               |                  |                     |                                                   |                     |                       |                     |                  |                     |                       |                     |
| < 75 <sup>th</sup>                                                            | 1                | -                   | 1                                                 | -                   | 1                     | -                   | 1                | -                   | 1                     | -                   |
| $\geq 75^{\text{th}}$ ( $\geq 4.73\mu\text{g/mL}$ )                           | 1.07             | [0.96,1.19]         | 1.04                                              | [0.86,1.25]         | 1.01                  | [0.80,1.29]         | 1.07             | [0.79,1.44]         | 1.08                  | [0.95,1.22]         |
| <b>Chronic Conditions<sup>§</sup></b>                                         |                  |                     |                                                   |                     |                       |                     |                  |                     |                       |                     |
| < 75 <sup>th</sup>                                                            | 1                | -                   | 1                                                 | -                   | 1                     | -                   | 1                | -                   | 1                     | -                   |
| $\geq 75^{\text{th}}$ ( $\geq 4.73\mu\text{g/mL}$ )                           | 1.05             | [0.95,1.17]         | 1.02                                              | [0.85,1.23]         | 1.01                  | [0.80,1.28]         | 1.07             | [0.80,1.43]         | 1.05                  | [0.93,1.19]         |

<sup>+</sup> Demographic model: adjusted for age, sex, education categories, *APOE-ε4* allele status, and wave. Note: the demographic model in the overall sample (N=6,151) additionally adjust for racialized social groups

<sup>§</sup> Risk factors model: adjusted for age, sex, education categories, *APOE-ε4* allele status, wave, smoking status, alcohol consumption, body mass index.

<sup>§</sup> Chronic conditions model: adjusted for age, sex, education categories, *APOE-ε4* allele status, wave, smoking status, alcohol consumption, body mass index, and chronic conditions

<sup>1</sup> IRR: incidence rate ratio, CI: confidence interval in brackets,

\*  $p < 0.05$ , \*\*  $p < 0.01$ , \*\*\*  $p < 0.001$

**Supplemental Table 10:** Incidence rate ratios from Poisson regression analysis, estimates represent the association between C-reactive protein (CRP) (standardized log transformation) and 6-year incident dementia in the United States Health and Retirement Study. Models are stratified by racialized social groups and minoritized status.

|                                       | Incident Dementia      |                           |                                                   |                           |                        |                           |                        |                           |                        |                           |
|---------------------------------------|------------------------|---------------------------|---------------------------------------------------|---------------------------|------------------------|---------------------------|------------------------|---------------------------|------------------------|---------------------------|
|                                       | Overall                |                           | Minoritized<br>(non-Hispanic<br>Black & Hispanic) |                           | Non-Hispanic<br>Black  |                           | Hispanic               |                           | Non-Hispanic<br>white  |                           |
|                                       | N = 6,908              |                           | N = 1,446                                         |                           | N = 813                |                           | N = 633                |                           | N = 5,462              |                           |
| <b>Models</b>                         | <b>IRR<sup>1</sup></b> | <b>95% CI<sup>1</sup></b> | <b>IRR<sup>1</sup></b>                            | <b>95% CI<sup>1</sup></b> | <b>IRR<sup>1</sup></b> | <b>95% CI<sup>1</sup></b> | <b>IRR<sup>1</sup></b> | <b>95% CI<sup>1</sup></b> | <b>IRR<sup>1</sup></b> | <b>95% CI<sup>1</sup></b> |
| <b>Unadjusted</b>                     |                        |                           |                                                   |                           |                        |                           |                        |                           |                        |                           |
| Log CRP                               | 1.04                   | [0.96,1.11]               | 0.99                                              | [0.88,1.12]               | 0.95                   | [0.82,1.09]               | 1.05                   | [0.86,1.30]               | 1.00                   | [0.91,1.09]               |
| <b>Demographic<sup>+</sup></b>        |                        |                           |                                                   |                           |                        |                           |                        |                           |                        |                           |
| Log CRP                               | 1.05                   | [0.98,1.13]               | 1.05                                              | [0.94,1.17]               | 1.01                   | [0.88,1.16]               | 1.09                   | [0.89,1.33]               | 1.05                   | [0.96,1.15]               |
| <b>Risk Factors<sup>§</sup></b>       |                        |                           |                                                   |                           |                        |                           |                        |                           |                        |                           |
| Log CRP                               | 1.07                   | [0.99,1.15]               | 1.05                                              | [0.93,1.18]               | 1.02                   | [0.88,1.18]               | 1.07                   | [0.98,1.17]               | 1.07                   | [0.98,1.17]               |
| <b>Chronic Conditions<sup>§</sup></b> |                        |                           |                                                   |                           |                        |                           |                        |                           |                        |                           |
| Log CRP                               | 1.06                   | [0.99,1.14]               | 1.05                                              | [0.93,1.19]               | 1.03                   | [0.89,1.19]               | 1.03                   | [0.89,1.16]               | 1.07                   | [0.98,1.16]               |

<sup>+</sup> Demographic model: adjusted for age, sex, education categories, *APOE-ε4* allele status, and wave. Note: the demographic model in the overall sample (N=6,908) additionally adjust for racialized social groups

<sup>§</sup> Risk factors model: adjusted for age, sex, education categories, *APOE-ε4* allele status, wave, smoking status, alcohol consumption, body mass index.

<sup>§</sup> Chronic conditions model: adjusted for age, sex, education categories, *APOE-ε4* allele status, wave, smoking status, alcohol consumption, body mass index, and chronic conditions

<sup>1</sup> IRR: incidence rate ratio, CI: confidence interval in brackets,

\*  $p < 0.05$ , \*\*  $p < 0.01$ , \*\*\*  $p < 0.001$

**Supplemental Table 11:** 4-way mediation analysis decomposition for racialized disparities in incident dementia using C-reactive protein (standardized log transformation) as mediator. Models are stratified by minoritized status and racialized social groups in a sample of United States adults in the Health and Retirement Study

| Mediator (CRP)                | Incident Dementia*                                             |         |         |         |                                                          |         |         |         |                                                |         |         |         |
|-------------------------------|----------------------------------------------------------------|---------|---------|---------|----------------------------------------------------------|---------|---------|---------|------------------------------------------------|---------|---------|---------|
|                               | Minoritized Racial Group<br>vs non-Hispanic white<br>N = 6,908 |         |         |         | non-Hispanic Black<br>vs non-Hispanic white<br>N = 6,275 |         |         |         | Hispanic<br>vs non-Hispanic white<br>N = 6,095 |         |         |         |
|                               | Estimate                                                       | [95%CI] | [95%CI] | p-value | Estimate                                                 | [95%CI] | [95%CI] | p-value | Estimate                                       | [95%CI] | [95%CI] | p-value |
| <b>Excess Risk</b>            |                                                                |         |         |         |                                                          |         |         |         |                                                |         |         |         |
| RERI Controlled Direct Effect | 1.45                                                           | 1.12    | 1.84    | 0.00    | 1.65                                                     | 1.23    | 2.15    | 0.00    | 1.30                                           | 0.84    | 1.83    | 0.00    |
| RERI Interaction Reference    | 0.00                                                           | -0.02   | 0.03    | 0.62    | -0.01                                                    | -0.02   | 0.03    | 0.63    | 0.01                                           | -0.01   | 0.10    | 0.68    |
| RERI Interaction Mediation    | 0.03                                                           | -0.01   | 0.08    | 0.12    | 0.04                                                     | -0.04   | 0.14    | 0.29    | 0.01                                           | -0.01   | 0.07    | 0.38    |
| RERI Pure Indirect Effect     | 0.00                                                           | -0.01   | 0.02    | 0.40    | 0.01                                                     | -0.01   | 0.03    | 0.21    | 0.00                                           | 0.00    | 0.01    | 0.46    |
| <b>% Attributable</b>         |                                                                |         |         |         |                                                          |         |         |         |                                                |         |         |         |
| % Controlled Direct Effect    | 0.98                                                           | 0.93    | 1.00    | 0.00    | 0.97                                                     | 0.91    | 1.01    | 0.00    | 0.98                                           | 0.88    | 1.01    | 0.00    |
| % Interaction Reference       | 0.00                                                           | -0.01   | 0.02    | 0.62    | -0.01                                                    | -0.01   | 0.02    | 0.63    | 0.01                                           | -0.01   | 0.08    | 0.68    |
| % Interaction Mediation       | 0.02                                                           | 0.00    | 0.05    | 0.12    | 0.03                                                     | -0.02   | 0.08    | 0.29    | 0.01                                           | -0.01   | 0.05    | 0.38    |
| % Pure Indirect Effect        | 0.00                                                           | 0.00    | 0.01    | 0.40    | 0.01                                                     | 0.00    | 0.02    | 0.21    | 0.00                                           | 0.00    | 0.01    | 0.46    |
| Percent Mediated              | 0.02                                                           | 0.00    | 0.05    | 0.06    | 0.03                                                     | -0.02   | 0.09    | 0.19    | 0.01                                           | -0.01   | 0.05    | 0.33    |
| Percent due to Interaction    | 0.02                                                           | 0.00    | 0.06    | 0.19    | 0.02                                                     | -0.01   | 0.09    | 0.33    | 0.02                                           | -0.01   | 0.12    | 0.37    |
| Percent Eliminated            | 0.02                                                           | 0.00    | 0.07    | 0.06    | 0.03                                                     | -0.01   | 0.09    | 0.16    | 0.02                                           | -0.01   | 0.12    | 0.29    |

\*Outcome 6-year incident dementia, model adjusting for age, sex, education categories, *APOE-ε4* allele status, wave, smoking status, alcohol consumption, body mass index, and chronic conditions. Minoritized racial group: (non-Hispanic Black and Hispanic participants)

**Supplemental Table 12:** Randomized analogue mediation model for racial disparities in incident dementia using C-reactive protein (standardized log transformation) as mediator. Models are stratified by minoritized status and racialized social groups in a sample of United States adults in the Health and Retirement Study

| Mediator (CRP)                | Incident Dementia <sup>+</sup>                                 |         |         |         |                                                          |         |         |         |                                                |         |         |         |
|-------------------------------|----------------------------------------------------------------|---------|---------|---------|----------------------------------------------------------|---------|---------|---------|------------------------------------------------|---------|---------|---------|
|                               | Minoritized Racial Group<br>vs non-Hispanic white<br>N = 6,908 |         |         |         | non-Hispanic Black<br>vs non-Hispanic white<br>N = 6,275 |         |         |         | Hispanic<br>vs non-Hispanic white<br>N = 6,095 |         |         |         |
|                               | Estimate                                                       | [95%CI] | [95%CI] | p-value | Estimate                                                 | [95%CI] | [95%CI] | p-value | Estimate                                       | [95%CI] | [95%CI] | p-value |
| <b>Excess Risk</b>            |                                                                |         |         |         |                                                          |         |         |         |                                                |         |         |         |
| RERI Controlled Direct Effect | 1.48                                                           | 1.15    | 1.89    | 0.00    | 1.72                                                     | 1.32    | 2.29    | 0.00    | 1.25                                           | 0.81    | 1.74    | 0.00    |
| RERI Interaction Reference    | 0.01                                                           | -0.01   | 0.06    | 0.51    | 0.02                                                     | 0.00    | 0.07    | 0.53    | 0.03                                           | 0.00    | 0.15    | 0.28    |
| RERI Interaction Mediation    | 0.02                                                           | -0.01   | 0.08    | 0.12    | 0.03                                                     | -0.03   | 0.13    | 0.29    | 0.00                                           | -0.01   | 0.08    | 0.35    |
| RERI Pure Indirect Effect     | 0.00                                                           | -0.01   | 0.02    | 0.40    | 0.01                                                     | -0.01   | 0.03    | 0.22    | 0.00                                           | 0.00    | 0.01    | 0.45    |
| <b>% Attributable</b>         |                                                                |         |         |         |                                                          |         |         |         |                                                |         |         |         |
| % Controlled Direct Effect    | 0.98                                                           | 0.92    | 1.00    | 0.00    | 0.97                                                     | 0.89    | 1.01    | 0.00    | 0.97                                           | 0.84    | 1.00    | 0.00    |
| % Interaction Reference       | 0.01                                                           | 0.00    | 0.04    | 0.51    | 0.01                                                     | 0.00    | 0.04    | 0.53    | 0.02                                           | 0.00    | 0.12    | 0.28    |
| % Interaction Mediation       | 0.02                                                           | 0.00    | 0.05    | 0.12    | 0.02                                                     | -0.02   | 0.07    | 0.29    | 0.00                                           | -0.01   | 0.06    | 0.35    |
| % Pure Indirect Effect        | 0.00                                                           | 0.00    | 0.01    | 0.40    | 0.00                                                     | 0.00    | 0.01    | 0.22    | 0.00                                           | 0.00    | 0.01    | 0.45    |
| Percent Mediated              | 0.02                                                           | 0.00    | 0.05    | 0.06    | 0.02                                                     | -0.01   | 0.07    | 0.19    | 0.00                                           | -0.01   | 0.06    | 0.31    |
| Percent due to Interaction    | 0.02                                                           | -0.01   | 0.08    | 0.15    | 0.03                                                     | -0.02   | 0.10    | 0.31    | 0.03                                           | -0.01   | 0.16    | 0.22    |
| Percent Eliminated            | 0.02                                                           | 0.00    | 0.08    | 0.07    | 0.03                                                     | -0.01   | 0.11    | 0.20    | 0.03                                           | 0.00    | 0.16    | 0.18    |

<sup>+</sup> Model: outcome 6-year incident dementia, model adjusting for age, sex, education categories, wave, smoking status, alcohol consumption, body mass index, and chronic conditions, using *APOE-ε4* allele status as variable affected by the racialized social group through ancestry. Minoritized racial group: (non-Hispanic Black and Hispanic participants)



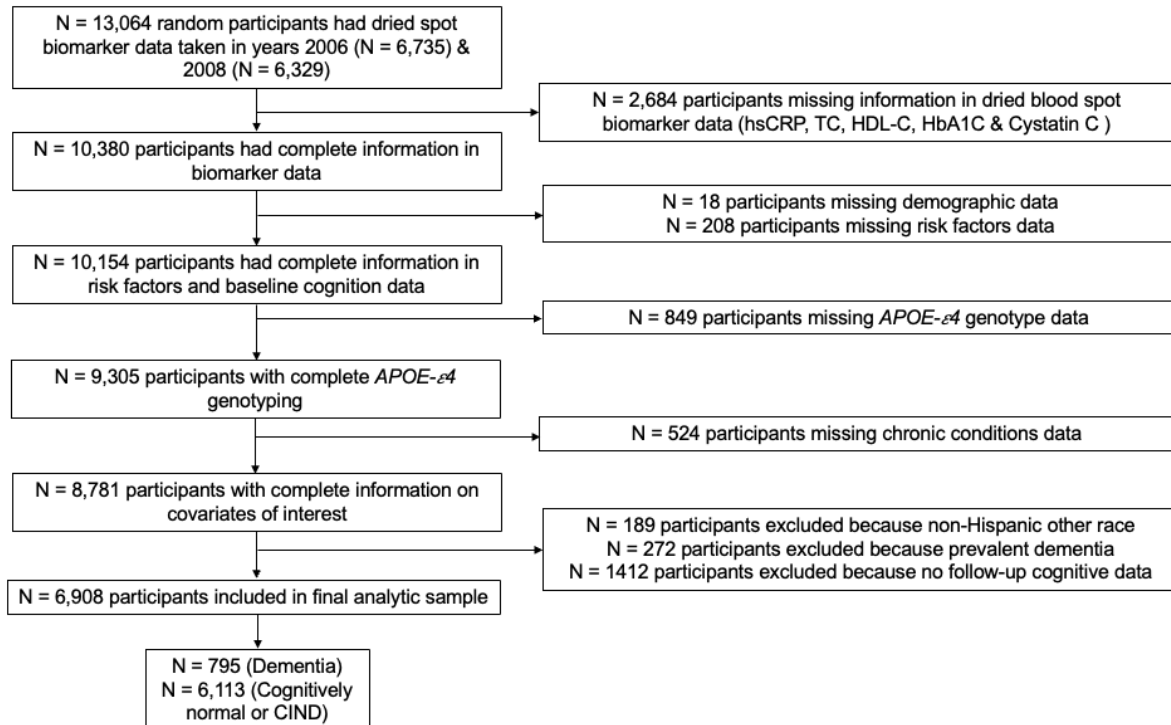

**Supplemental Figure 1:** Flow diagram of analytic sample study in the Health and Retirement Study. CRP: C-reactive protein, TC: total cholesterol; HDL-C: high density lipoprotein; HbA1C: glycosylated hemoglobin, *APOE-ε4*: apolipoprotein E  $\epsilon 4$  allele carrier status, CIND: cognitive impairment non-dementia.

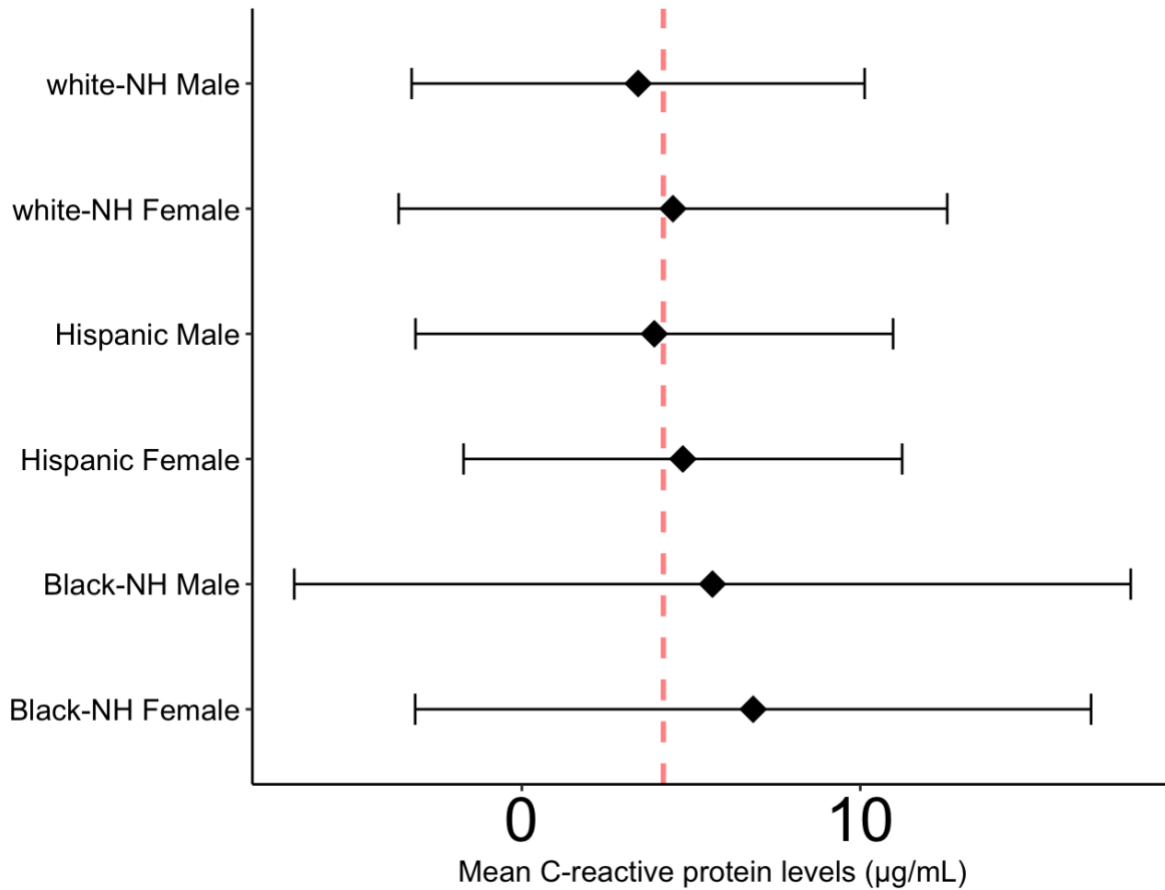

**Supplemental Figure 2:** Baseline C-reactive protein levels ( $\mu\text{g/mL}$ ) by racialized social groups and sex in the United States Health and Retirement Study, waves 2006 & 2008. Dotted red line denotes the average levels of C-reactive protein in the overall sample ( $4.37\mu\text{g/mL}$ ). Dots represent mean C-reactive protein levels in each group and error bars illustrate the standard deviation. white-NH: non-Hispanic white ( $n=5,462$ ; non-Hispanic white women,  $n=3,278$ ). Black-NH: non-Hispanic Black ( $n=813$ ; non-Hispanic Black women,  $n=553$ ). Hispanic ( $n=633$ ; Hispanic women = 403)

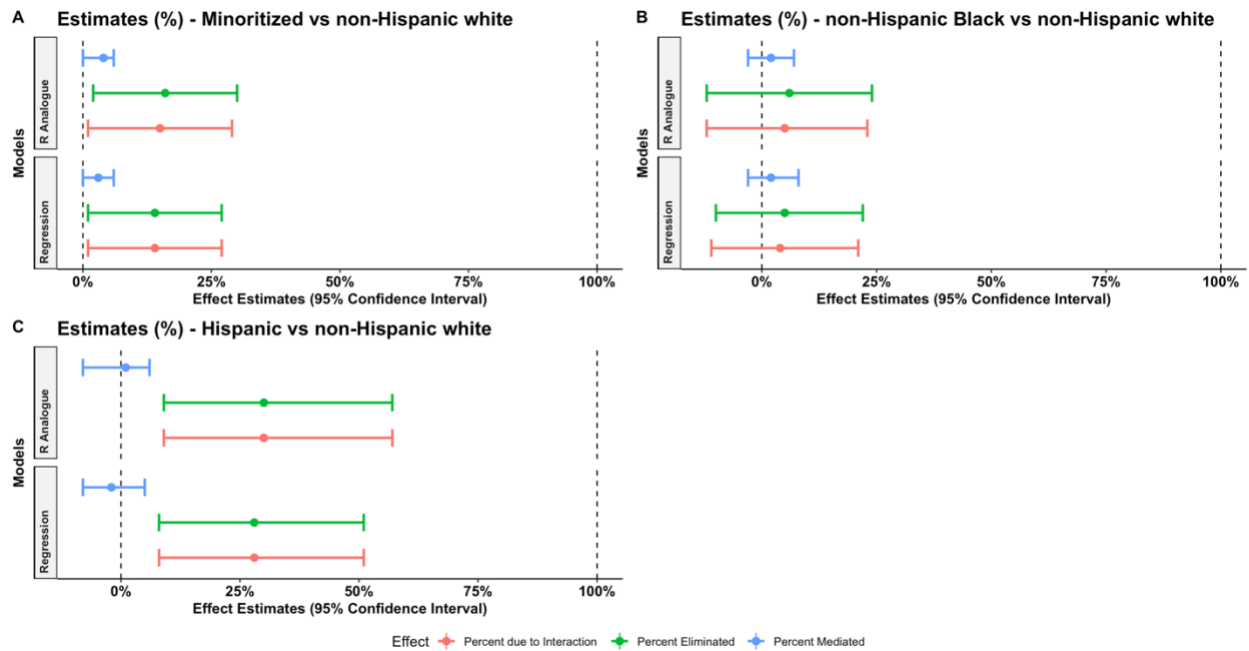

**Supplemental Figure 3:** Plot of mediation analysis estimates from regression-based and randomized analogue models denoting percent of the racial disparity in incident dementia that is due to the mediating effect of C-reactive protein, the percent due to the interaction between exposure and mediator, and the proportion eliminated. **A.** Mediation estimates from the racial disparity between the minoritized racial group (non-Hispanic Black and Hispanic) vs the non-Hispanic white group. **B.** Mediation estimates from the racial disparity between the non-Hispanic Black vs the non-Hispanic white group. **C.** Mediation estimates from the racial disparity between the Hispanic group vs the non-Hispanic white group.

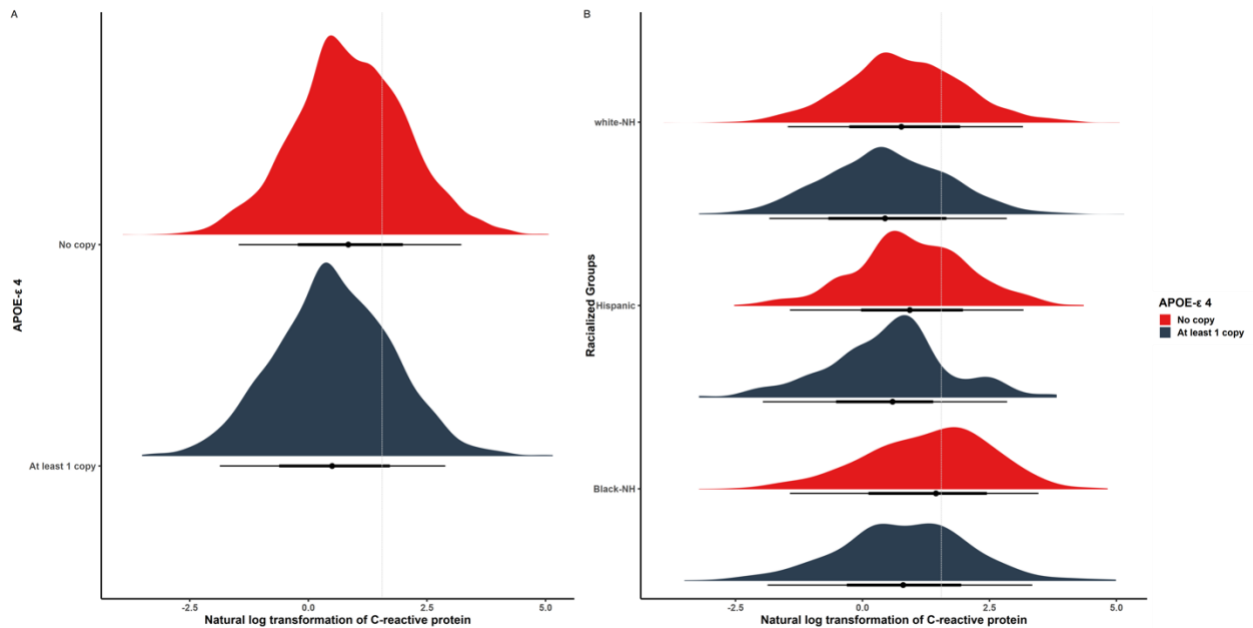

**Supplemental Figure 4:** Density plot of natural logarithmic transformation of C-reactive protein (CRP) in a selected sample of United States adults in the Health and Retirement Study. **A.** Distribution of the natural logarithmic transformation of C-reactive protein (CRP) by *APOE-ε4* allele carrier status in our selected sample from the Health and Retirement Study (HRS). Dotted line denotes the cut off point for elevated levels of CRP at the 75th percentile ( $\geq 4.73\mu\text{g/mL}$ ,  $n=8,320$ ). **B.** Distribution of CRP by racialized groups and *APOE-ε4* allele carrier status. white-NH: non-Hispanic white ( $n=6,602$ ), Black-NH: non-Hispanic Black ( $n=971$ ), Hispanic ( $n=747$ )
