# Supplementary material for: The mediating role of systemic inflammation and moderating role of racialization in disparities in incident dementia
Source: PubMed Central journal article supplement (PMC11246521; doi:10.1038/s43856-024-00569-w), 2024-07-13
Supplement: 43856_2024_569_MOESM3_ESM.pdf [file 43856_2024_569_MOESM3_ESM.pdf]

## Description of Additional Supplementary Files

**File name:** Supplementary Data 1

**File Description:** This file is the data source to create the main Figure 2 of the manuscript.
